# Supplementary material
Source: PubMed Central journal article supplement (PMC2790561)
Supplement: mmc1.pdf [file mmc1.pdf]

AJHG, Volume 85

## **Supplemental Data**

### **Dosage-Dependent Severity of the Phenotype in Patients with Mental Retardation Due to a Recurrent Copy-Number**

### **Gain at Xq28 Mediated by an Unusual Recombination**

Joke Vandewalle, Hilde Van Esch, Karen Govaerts, Jelle Verbeeck, Christiane Zweier, Irene Madrigal, Montserrat Mila, Elly Pijkels, Isabel Fernandez, Jürgen Kohlhase, Christiane Spaich, Anita Rauch, Jean-Pierre Fryns, Peter Marynen, and Guy Froyen

**Table S1.** Primer sequences used for copy number analysis, expression profiling, and breakpoint analysis in the four families. All positions are based on the UCSC genome browser (NCBI Build 36.1, Hg18, March 2006).

**qPCR primer sequences for mapping the aberrations and for copy number quantification**

| locus ID   | forward primer (5' to 3') | reverse primer (5' to 3') | position  |
|------------|---------------------------|---------------------------|-----------|
| normalizer | GGTGTCCAAGCCACTGAAT       | GTGACTTGGTGACTCACAGTTA    | 48257866  |
| 1          | TGCTGGATGAATAACCACAACAC   | GAAGGTCTCCAGCCATCAGAAG    | 152958445 |
| 2          | TCCCAGCTGAGAGTCCATCTG     | CACGTCTTCTCAACCTAATGGAATT | 153056474 |
| 3          | GGATGGGACGCTGCTACAGA      | GGACATGGTATCAGGTGGACTCA   | 153190779 |
| 4          | TAACACCCACAGCCACAT        | AAGTCCGGGCTCAAATACC       | 153201372 |
| 5          | GCCATAAAGCAGGTGTTTCCA     | TTTCCATTTGGTGGCGTTTT      | 153208098 |
| 6          | CACAGCAAATGCAGAAAACAGT    | TTTCCAGGCGCAAACACT        | 153210170 |
| 7          | TGGAGCTGAGGGAGGAT         | AGACAAGGGCCAGGAAG         | 153228970 |
| 8          | CCGCGGGTTCGCACTTAC        | CAAATCAGTGGCTCTCCCTCTT    | 153232685 |
| 9          | CATGCACGCTACCAGCAGTC      | AGAATGATGTGCCAGAGACGC     | 153263348 |
| 10         | TGCTGGTTCTCACACCTT        | TCAGTGGCTGCAACGAAA        | 153279966 |
| 11         | TTGACCTGATTCCCAAATTCCT    | CCCCGACCTGCAATACC         | 153320372 |
| 12         | CGCAGGGAAGGGTTTGTG        | AAAAGAGGGTCCCAGGAACAG     | 153344474 |
| 13         | ACGGACGTCATCTGAGTTGGT     | CACCTACTGCAGATGCTGTGTCT   | 153414994 |
| 14         | TGGGTGGTGCCAGCATCT        | CAGCTTTCCGCCAGTTCT        | 153485548 |
| 15         | TCCAGTGTGAAAGCAGCAAG      | ATGATCCAAACTCCTGAGTCC     | 153515781 |
| 16         | GGAGTAAGATTCTGCCACCATTG   | CCATCTTGTTCAGCCTCTGA      | 153559191 |
| 17         | CCAAATGCCGTGCCTCTTT       | TGGACCACGTTGGGTATTCA      | 153634659 |

**qPCR primer sequences for copy number analysis of LCR sets**

| locus ID | forward primer (5' to 3') | reverse primer (5' to 3') | position      |
|----------|---------------------------|---------------------------|---------------|
| K1/K2    | GCCTTCCCTGAGGAATGT        | CCAGGACCCTGTACCCGA        | 153226431     |
|          |                           |                           | and 153268727 |
| L1/L2    | TCCAGTGTGAAAGCAGCAAG      | ATGATCCAAACTCCTGAGTCC     | 153451460     |
|          |                           |                           | and 153515781 |

**qPCR primer sequences for gene expression analysis**

| gene ID        | forward primer (5' to 3') | reverse primer (5' to 3') | map     |
|----------------|---------------------------|---------------------------|---------|
| <i>FLNA</i>    | CAGATGAGGCCAGGATCA        | CATCAAACCTGGTGTCCATCGA    | ex1-2   |
| <i>GDI1</i>    | CCTGCAACGACATCAAAGACA     | TTTGCCTTCATGTTCTCAAAG     | ex11    |
| <i>RPL10</i>   | TGCTGGTTCTCACACCTT        | TCAGTGGCTGCAACGAAA        | ex1     |
| <i>ATP6AP1</i> | TCTGCTGCTCATTGCGC         | CTCATCGTTGCCTGTGAGGA      | ex4-5   |
| <i>HUWE1</i>   | ACAGGCCATGCAGAGCTTTAA     | ATACGTTCTCTGTACCAACAACCT  | ex23-24 |
| <i>PORCN</i>   | CTCTGCCGACATTCCTCC        | TGTGCATCTCACCCATGAGT      | ex2-3   |
| <i>HPRT</i>    | TGACACTGGCAAAACAATGCA     | GGTCCTTTTACCAGCAAGCT      | ex6-7   |
| <i>ACTB</i>    | CACCCTGAAGTACCCCATCG      | CACGGCATCGTCACCAACTGGG    | ex3     |
| <i>GUSB</i>    | AGAGTGGTGCTGAGGATTGG      | CCCTCATGCTCTAGCGTGTC      | ex2-3   |

**Table S2.** Summary of the 44K array data for duplication mapping in families 1 to 4. All positions are based on the UCSC genome browser (NCBI Build 36.1, Hg18, March 2006).

|                       | Family 1 (IV.2)                           | Family 2 (II.1)                           | Family 3 (II.2)                          | Family 4 (II.1)                                         |                    |                    |
|-----------------------|-------------------------------------------|-------------------------------------------|------------------------------------------|---------------------------------------------------------|--------------------|--------------------|
| Region 1 (R1)         | 153,063,119<br>mean: -0.39<br>153,174,273 | 153,063,119<br>mean: -0.04<br>153,176,589 | 153,075,872<br>mean: 0.47<br>153,176,589 | 153,062,921<br>mean: -0.54<br>153,176,459               | JA-JB-JC           |                    |
| Region 2 (R2)         | 153,218,037<br>mean: 0.58<br>153,277,405  | 153,218,037<br>mean: 0.99<br>153,276,349  | 153,218,037<br>mean: 0.76<br>153,272,904 | 153,218,037<br>mean: 0.53<br>153,277,380                | K1-K2              | 153.217<br>153.278 |
| Region 3 (R3 and R3') | 153,278,883<br>mean: 0.97<br>153,440,851  | 153,277,032<br>mean: 1.43<br>153,428,103  | 153,273,266<br>mean: 1.15<br>153,443,457 | 153,277,390<br>mean: 0.91<br>153,308,905<br>153,308,932 | intervening region |                    |
| Region 4 (R4 and R4') | 153,440,879<br>mean: 0.63<br>153,535,824  | 153,428,204<br>mean: 1.07<br>153,542,213  | 153,443,474<br>mean: 0.82<br>153,535,824 | mean: 0.50<br>153,535,824                               | L1-L2              | 153.437<br>153.531 |
| Size                  | 317.787                                   | 324.176                                   | 317.787                                  | 317.787                                                 |                    |                    |

## Figure S1

Pictures of affected male individuals of family 1. The proband IV.2 and his mother III.11 (A), male III.10 (B) and III.19 (C) are shown.

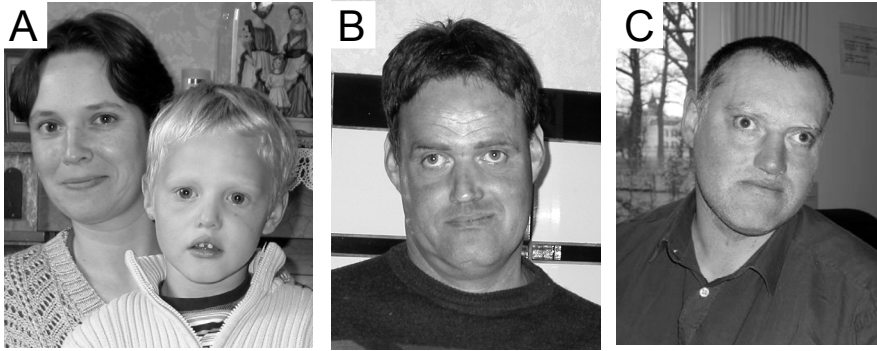

Figure S1

## Figure S2

X chromosome-specific array-CGH plots obtained for probands of **A.** Family 1 and **B.** Family 2 revealing the duplications at Xq28. DNA from two unrelated MR patients were differentially labeled and co-hybridized onto the X-array. The log<sub>2</sub> normalized intensity ratios of the Cy5 (patient with duplication) and Cy3 (unrelated MR patient) signals are plotted (Y-axis) against the position on the X chromosome (in Mb), from Xpter to Xqter (X-axis). The duplications are visible as clones with aberrant ratios >0.3 (arrows). Other clones outside the normal interval are confirmed polymorphic clones or outliers.

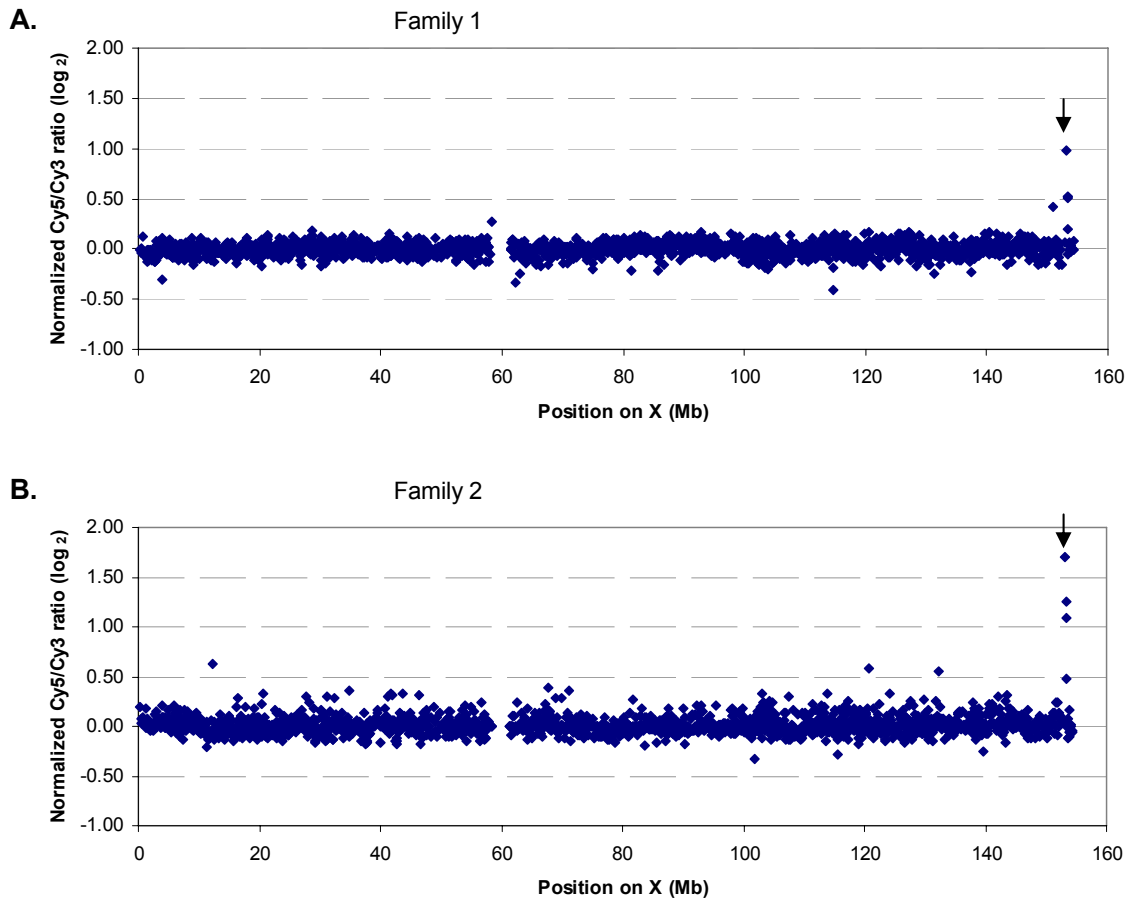

Figure S2

### Figure S3

Relative copy number (indicated by the numbers above each bar) at several loci within the R3 region in the probands of the four families (Fam) as determined by qPCR, normalized to the *PORCN* locus on the X chromosome and relative to two male control samples (Co1 and Co2). The data represent the average of at least 4 independent experiments and standard deviations are indicated.

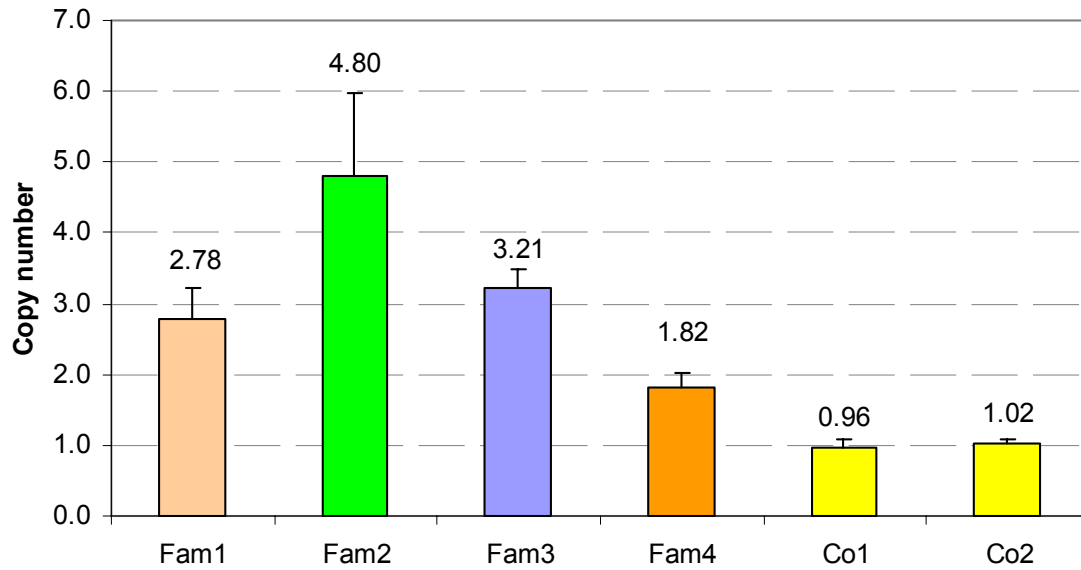

Figure S3

**Figure S4**

Alternative inversion polymorphism-dependent recombination model to explain the triplication found in families 1 and 3. In Step 1, an inversion takes place in between the members of the K- and L-LCRs, which results in the repositioning of K2 and L1. This relocation then allows NAHR between sister chromatids resulting in duplication of the intervening sequence R3 (Step 2: NAHR1). In Step 3a (or 3b) a second NAHR will yield triplication (or quadruplication) of this intervening sequence (NAHR2).

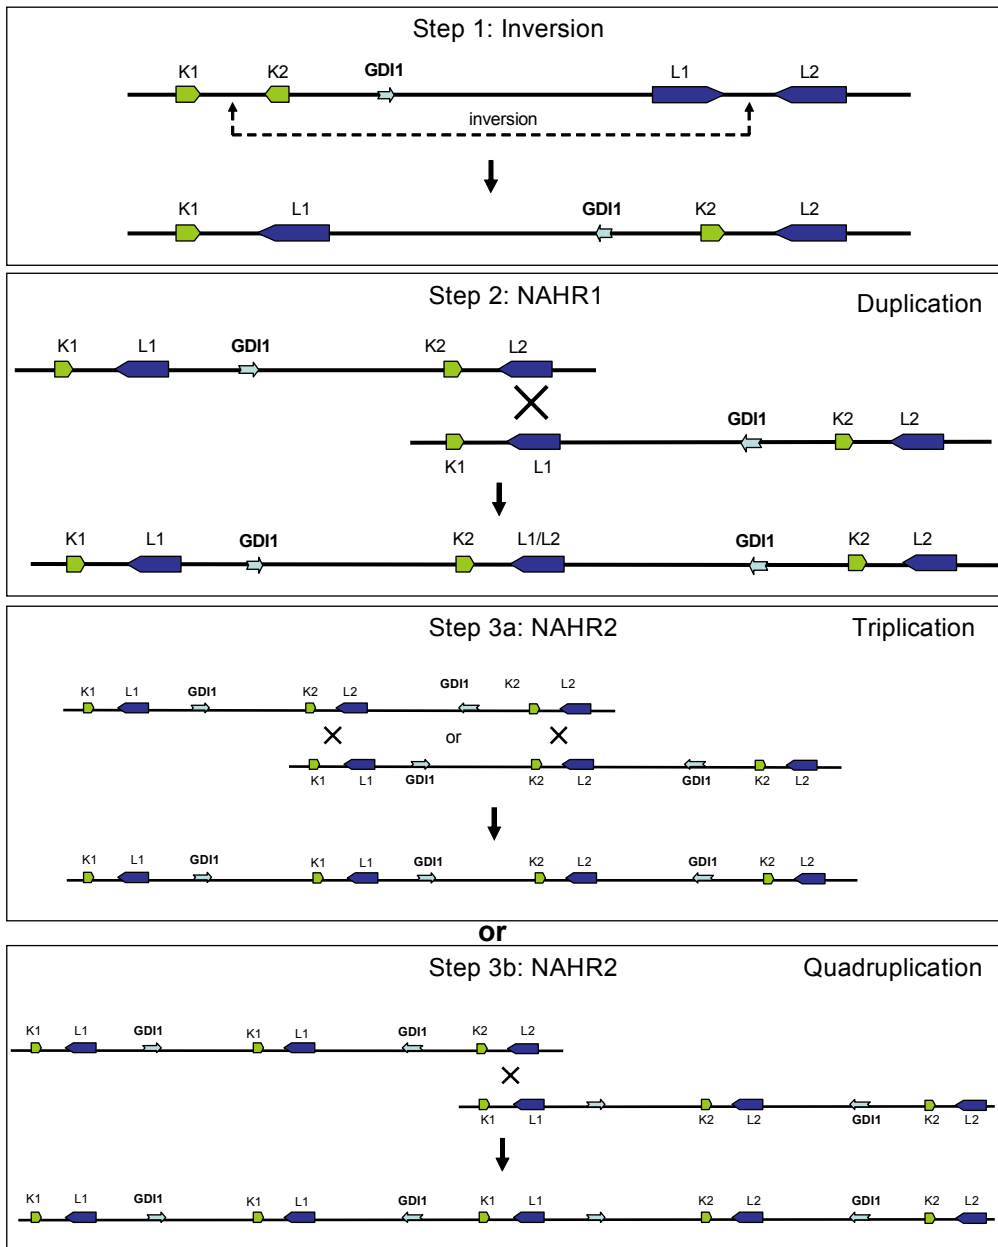

**Figure S4**
